# Supplementary material
Source: ML conference proceedings conference paper supplement (https://openaccess.thecvf.com/content/CVPR2023/html/Trosten_Hubs_and_Hyperspheres_CVPR_2023_paper.html)
Supplement: Supplementary file 1 [file Trosten_Hubs_and_Hyperspheres_CVPR_2023_supplemental.pdf]

# Supplementary material – Hubs and Hyperspheres: Reducing Hubness and Improving Transductive Few-shot Learning with Hyperspherical Embeddings

Daniel J. Trosten<sup>\*,†</sup>, Riddhi Chakraborty<sup>\*,†</sup>, Sigurd Løkse<sup>†</sup>, Kristoffer Knutsen Wickstrøm<sup>†</sup>,  
Robert Jenssen<sup>†,‡,§,¶</sup>, Michael C. Kampffmeyer<sup>†,‡</sup>

Department of Physics and Technology, UiT The Arctic University of Norway

firstname[.middle initial].lastname@uit.no

## 1. Introduction

Here we provide proofs for our theoretical results on the hyperspherical uniform and hubness; the decomposition of the KL divergence; and the minima of our methods' loss functions. We also give additional details on the implementation and hyperparameters for noHub and noHub-S– and include the complete tables of 1-shot and 5-shot results for all classifiers, datasets and feature extractors. Finally, we briefly reflect on potential negative societal impacts of our work.

## 2. Hyperspherical Uniform Eliminates Hubness

**Definition 1** (Uniform PDF on the hypersphere.). *The uniform probability density function (PDF) on the unit hypersphere  $\mathbb{S}_d = \{\mathbf{x} \in \mathbb{R}^d \mid \|\mathbf{x}\| = 1\} \subset \mathbb{R}^d$  is*

$$u_{\mathbb{S}_d}(\mathbf{x}) = A_d^{-1} \delta(\|\mathbf{x}\| - 1) \quad (1)$$

where  $A_d = \frac{2\pi^{d/2}}{\Gamma(d/2)}$  is the surface area of  $\mathbb{S}_d$ , and  $\delta(\cdot)$  is the Dirac delta distribution.

**Lemma 1** (Trisection of hypersphere). *The trisection of the hypersphere along coordinate  $i$  is given by the three-tuple of disjoint sets  $(\mathbb{S}_d^{i,+}, \mathbb{S}_d^{i,-}, \mathbb{S}_d^{i,0})$  where*

$$\mathbb{S}_d^{i,+} = \{\mathbf{x} = [x^1, \dots, x^d]^\top \in \mathbb{S}_d \mid x^i > 0\} \quad (2)$$

$$\mathbb{S}_d^{i,-} = \{\mathbf{x} = [x^1, \dots, x^d]^\top \in \mathbb{S}_d \mid x^i < 0\} \quad (3)$$

$$\mathbb{S}_d^{i,0} = \{\mathbf{x} = [x^1, \dots, x^d]^\top \in \mathbb{S}_d \mid x^i = 0\} \quad (4)$$

and

$$\mathbb{S}_d^{i,+} \cup \mathbb{S}_d^{i,-} \cup \mathbb{S}_d^{i,0} = \mathbb{S}_d \quad (5)$$

<sup>\*</sup>Equal contributions.

<sup>†</sup>UiT Machine Learning group ([machine-learning.uit.no](http://machine-learning.uit.no)) and Visual Intelligence Centre ([visual-intelligence.no](http://visual-intelligence.no)).

<sup>‡</sup>Norwegian Computing Center.

<sup>§</sup>Department of Computer Science, University of Copenhagen.

<sup>¶</sup>Pioneer Centre for AI ([aicentre.dk](http://aicentre.dk)).

Then we have

$$\mathbb{S}_d^{i,+} = -\mathbb{S}_d^{i,-} = \{-\mathbf{x} \mid \mathbf{x} \in \mathbb{S}_d^{i,-}\} \quad (6)$$

*Proof.* Let  $\mathbf{x} \in \mathbb{S}_d^{i,+}$ , then

$$\|(-\mathbf{x})\| = \|\mathbf{x}\| = 1, \quad (7)$$

and

$$-(x^i) < 0. \quad (8)$$

Hence  $\mathbf{x} \in -\mathbb{S}_d^{i,-}$ , and  $\mathbb{S}_d^{i,+} \subseteq -\mathbb{S}_d^{i,-}$ .

Similarly, let  $-\mathbf{x} \in -\mathbb{S}_d^{i,-}$ , then

$$\| -(-\mathbf{x}) \| = \|\mathbf{x}\| = 1, \quad (9)$$

and

$$-(-x^i) = x^i > 0. \quad (10)$$

Hence  $\mathbf{x} \in \mathbb{S}_d^{i,+}$ , and  $-\mathbb{S}_d^{i,-} \subseteq \mathbb{S}_d^{i,+}$ .

It then follows that  $\mathbb{S}_d^{i,+} = -\mathbb{S}_d^{i,-}$ . □

**Proposition 1.** *Suppose  $\mathbf{X}$  has PDF  $u_{\mathbb{S}_d}(\mathbf{x})$ . Then*

$$\mathbb{E}(\mathbf{X}) = 0 \quad (11)$$

*Proof.* The expectation  $\mathbb{E}(\mathbf{X})$  is given by

$$\mathbb{E}(\mathbf{X}) = \int_{\mathbb{R}^d} \mathbf{x} u_{\mathbb{S}_d}(\mathbf{x}) d\mathbf{x} \quad (12)$$

Since  $u_{\mathbb{S}_d}$  is non-zero only on the hypersphere  $\mathbb{S}_d$ , the integral can be rewritten as a surface integral over  $\mathbb{S}_d$

$$\mathbb{E}(\mathbf{X}) = \int_{\mathbb{S}_d} \mathbf{x} A_d^{-1} dS. \quad (13)$$

Decomposing the integral over the trisection of  $\mathbb{S}_d$  along coordinate  $i$  gives

$$\int_{\mathbb{S}_d} \mathbf{x} A_d^{-1} dS = \quad (14)$$

$$A_d^{-1} \left( \int_{\mathbb{S}_d^{i,+}} \mathbf{x} dS + \int_{\mathbb{S}_d^{i,-}} \mathbf{x} dS + \int_{\mathbb{S}_d^{i,0}} \mathbf{x} dS \right). \quad (15)$$

By Lemma 1 we have

$$\mathbb{S}_d^{i,+} = -\mathbb{S}_d^{i,-} \Rightarrow \int_{\mathbb{S}_d^{i,+}} \mathbf{x} dS = - \int_{\mathbb{S}_d^{i,-}} \mathbf{x} dS. \quad (16)$$

Furthermore, since the set  $\mathbb{S}_d^{i,0}$  has zero width along coordinate  $i$ ,  $\int_{\mathbb{S}_d^{i,0}} \mathbf{x} dS = 0$ . Hence

$$\mathbb{E}(\mathbf{X}) = \quad (17)$$

$$A_d^{-1} \left( \int_{\mathbb{S}_d^{i,+}} \mathbf{x} dS - \int_{\mathbb{S}_d^{i,+}} \mathbf{x} dS + \int_{\mathbb{S}_d^{i,0}} \mathbf{x} dS \right) = 0 \quad (18)$$

□

**Proposition 2.** Let  $\Pi_{\mathbf{p}}$  be the tangent plane of  $\mathbb{S}_d$  at an arbitrary point  $\mathbf{p} \in \mathbb{S}_d$ . Then, for any direction  $\boldsymbol{\theta}^*$  in  $\Pi_{\mathbf{p}}$  the directional derivative of  $u_{\mathbb{S}_d}$  along  $\boldsymbol{\theta}^*$  is

$$\nabla_{\boldsymbol{\theta}^*} u_{\mathbb{S}_d} = 0 \quad (19)$$

*Proof.*  $u_{\mathbb{S}_d}(\mathbf{x})$  can be written in polar coordinates as

$$u_{\mathbb{S}_d}(\mathbf{x}(r, \boldsymbol{\theta})) = u_{\mathbb{S}_d}^{\text{Polar}}(r, \boldsymbol{\theta}) = A_d^{-1} \delta(r-1) \quad (20)$$

The gradient of  $u_{\mathbb{S}_d}^{\text{Polar}}(r, \boldsymbol{\theta})$  is then

$$\nabla_{(r, \boldsymbol{\theta})} u_{\mathbb{S}_d}^{\text{Polar}}(r, \boldsymbol{\theta}) = \begin{bmatrix} \frac{\partial}{\partial r} u_{\mathbb{S}_d}^{\text{Polar}}(r, \boldsymbol{\theta}) \\ 0 \\ \vdots \\ 0 \end{bmatrix} \quad (21)$$

For an arbitrary point  $\mathbf{p} \in \mathbb{S}_d$ , an arbitrary unit vector (direction),  $\boldsymbol{\theta}^*$ , in the tangent plane  $\Pi_{\mathbf{p}}$  is given by

$$\boldsymbol{\theta}^* = \begin{bmatrix} 0 \\ \theta_1^* \\ \vdots \\ \theta_{d-1}^* \end{bmatrix} \quad (22)$$

The directional derivative of  $u_{\mathbb{S}_d}(\mathbf{x})$  along  $\boldsymbol{\theta}^*$  is then

$$\nabla_{\boldsymbol{\theta}^*} u_{\mathbb{S}_d}(\mathbf{x}) = \begin{bmatrix} \frac{\partial}{\partial r} u_{\mathbb{S}_d}^{\text{Polar}}(r, \boldsymbol{\theta}) \\ 0 \\ \vdots \\ 0 \end{bmatrix}^{\top} \cdot \begin{bmatrix} 0 \\ \theta_1^* \\ \vdots \\ \theta_{d-1}^* \end{bmatrix} = 0 \quad (23)$$

□

### 3. Method

**Computing  $\kappa_i$ .** Following [5], we compute  $\kappa_i$  using a binary search such that

$$|\log_2(P) - H(P_i)| \leq 0.1 \cdot \log_2(P) \quad (24)$$

where  $P$  is a hyperparameter, and  $H(P_i)$  is the Shannon entropy of similarities for representation  $i$

$$H(P_i) = \sum_{j=1}^n p_{i|j} \log_2(p_{i|j}). \quad (25)$$

**Decomposition of  $KL(P||Q)$ .** Recall that

$$p_{ij} = \frac{p_{i|j} + p_{j|i}}{2}, \quad p_{i|j} = \frac{\exp(\kappa_i \mathbf{x}_i^{\top} \mathbf{x}_j)}{\sum_{l,m} \exp(\kappa_i \mathbf{x}_l^{\top} \mathbf{x}_m)} \quad (26)$$

and

$$q_{ij} = \frac{\exp(\kappa \mathbf{z}_i^{\top} \mathbf{z}_j)}{\sum_{l,m} \exp(\kappa \mathbf{z}_l^{\top} \mathbf{z}_m)}. \quad (27)$$

Since  $p_{ij}$  is constant w.r.t.  $q_{ij}$ , we have

$$\arg \min_{\mathbf{z}_1, \dots, \mathbf{z}_n \in \mathbb{S}_d} KL(P||Q) = \arg \min_{\mathbf{z}_1, \dots, \mathbf{z}_n \in \mathbb{S}_d} \sum_{i,j} p_{ij} \log \frac{p_{ij}}{q_{ij}} \quad (28)$$

$$= \arg \min_{\mathbf{z}_1, \dots, \mathbf{z}_n \in \mathbb{S}_d} \underbrace{\sum_{i,j} p_{ij} \log p_{ij}}_{\text{constant}} - \sum_{i,j} p_{ij} \log q_{ij} \quad (29)$$

$$= \arg \min_{\mathbf{z}_1, \dots, \mathbf{z}_n \in \mathbb{S}_d} \underbrace{- \sum_{i,j} p_{ij} \log q_{ij}}_{=:\tilde{\mathcal{L}}} \quad (30)$$

Minimizing  $KL(P||Q)$  over  $\mathbf{z}_1, \dots, \mathbf{z}_n \in \mathbb{S}_d$  is therefore equivalent to minimizing  $\tilde{\mathcal{L}}$ .

Decomposing  $\tilde{\mathcal{L}}$  gives

$$\tilde{\mathcal{L}} = - \sum_{i,j} p_{ij} \kappa \mathbf{z}_i^{\top} \mathbf{z}_j + \quad (31)$$

$$\sum_{i,j} \left( p_{ij} \log \sum_{l,m} \exp(\kappa \mathbf{z}_l^{\top} \mathbf{z}_m) \right) \quad (32)$$

$$= - \sum_{i,j} p_{ij} \kappa \mathbf{z}_i^{\top} \mathbf{z}_j \quad (33)$$

$$+ \left( \log \sum_{l,m} \exp(\kappa \mathbf{z}_l^{\top} \mathbf{z}_m) \right) \cdot \underbrace{\left( \sum_{i,j} p_{ij} \right)}_{=1} \quad (34)$$

$$= \underbrace{- \sum_{i,j} p_{ij} \kappa \mathbf{z}_i^{\top} \mathbf{z}_j}_{=:\mathcal{L}_{\text{LSP}}} + \log \sum_{l,m} \exp(\kappa \mathbf{z}_l^{\top} \mathbf{z}_m) \quad (35)$$

$=:\mathcal{L}_{\text{Unif}}$

Thus, we have shown that

$$\arg \min_{\mathbf{z}_1, \dots, \mathbf{z}_n \in \mathbb{S}_d} KL(P||Q) = \arg \min_{\mathbf{z}_1, \dots, \mathbf{z}_n \in \mathbb{S}_d} \mathcal{L}_{\text{LSP}} + \mathcal{L}_{\text{Unif}}. \quad (36)$$

#### 4. Theoretical Results

**Proposition 3.** Let  $W_{ij} = \frac{1}{2}\kappa p_{ij}$ , where  $\sum_{i,j} p_{ij} = 1$ , and let  $\mathbf{z}_1, \dots, \mathbf{z}_n \in \mathbb{S}_d$ . Then we have

$$\mathcal{L}_{\text{LSP}} = \sum_{i,j} \|\mathbf{z}_i - \mathbf{z}_j\|^2 W_{ij} - \kappa. \quad (37)$$

*Proof.* We have

$$\mathcal{L}_{\text{LSP}} = -\kappa \sum_{i,j} p_{ij} \mathbf{z}_i^\top \mathbf{z}_j \quad (38)$$

$$= -2 \sum_{i,j} \frac{1}{2} \kappa p_{ij} \mathbf{z}_i^\top \mathbf{z}_j + \sum_{i,j} 2 \frac{1}{2} \kappa p_{ij} - \kappa \quad (39)$$

$$\begin{aligned} & (\sum_{i,j} p_{ij} = 1) \\ & = -2 \sum_{i,j} \mathbf{z}_i^\top \mathbf{z}_j W_{ij} + \sum_{i,j} (\|\mathbf{z}_i\| + \|\mathbf{z}_j\|) W_{ij} - \kappa \end{aligned} \quad (40)$$

$$\begin{aligned} & (\|\mathbf{z}_i\| = \|\mathbf{z}_j\| = 1) \\ & = \sum_{i,j} (\|\mathbf{z}_i\| - 2\mathbf{z}_i^\top \mathbf{z}_j + \|\mathbf{z}_j\|) W_{ij} - \kappa \end{aligned} \quad (41)$$

$$= \sum_{i,j} \|\mathbf{z}_i - \mathbf{z}_j\|^2 W_{ij} - \kappa. \quad (42)$$

□

**Proposition 4** (Minimizing  $\mathcal{L}_{\text{Unif}}$  maximizes entropy). Let  $H_2(\cdot)$  be the 2-order Rényi entropy, estimated with a kernel density estimator using a Gaussian kernel. Then

$$\arg \min_{\mathbf{z}_1, \dots, \mathbf{z}_n \in \mathbb{S}_d} \mathcal{L}_{\text{Unif}} = \arg \max_{\mathbf{z}_1, \dots, \mathbf{z}_n \in \mathbb{S}_d} H_2(\mathbf{z}_1, \dots, \mathbf{z}_n). \quad (43)$$

*Proof.* Using a Gaussian kernel, the 2-order Rényi entropy can be estimated as [4, Eq. (2.13)]

$$H_2(\mathbf{z}_1, \dots, \mathbf{z}_n) = -\log \left( \frac{1}{n^2} \sum_{l,m} \exp(-\frac{1}{2}\kappa \|\mathbf{z}_l - \mathbf{z}_m\|^2) \right) \quad (44)$$

Thus, we have

$$\arg \max_{\mathbf{z}_1, \dots, \mathbf{z}_n \in \mathbb{S}_d} H_2(\mathbf{z}_1, \dots, \mathbf{z}_n) \quad (45)$$

$$= \arg \max_{\mathbf{z}_1, \dots, \mathbf{z}_n \in \mathbb{S}_d} -\log \left( \frac{1}{n^2} \sum_{l,m} \exp(-\frac{1}{2}\kappa \|\mathbf{z}_l - \mathbf{z}_m\|^2) \right) \quad (46)$$

$$= \arg \min_{\mathbf{z}_1, \dots, \mathbf{z}_n \in \mathbb{S}_d} \log \left( \sum_{l,m} \exp(-\frac{1}{2}\kappa \|\mathbf{z}_l - \mathbf{z}_m\|^2) \right) \quad (47)$$

$$= \arg \min_{\mathbf{z}_1, \dots, \mathbf{z}_n \in \mathbb{S}_d} \log \left( \sum_{l,m} \exp(-\frac{1}{2}\kappa (\|\mathbf{z}_l\|^2 \right. \quad (48)$$

$$\left. - 2\mathbf{z}_l^\top \mathbf{z}_m + \|\mathbf{z}_m\|^2) \right) \quad (49)$$

$$= \arg \min_{\mathbf{z}_1, \dots, \mathbf{z}_n \in \mathbb{S}_d} \log \left( \sum_{l,m} \exp(-\kappa (1 - \mathbf{z}_l^\top \mathbf{z}_m)) \right) \quad (50)$$

$$(\|\mathbf{z}_l\| = \|\mathbf{z}_m\| = 1)$$

$$= \arg \min_{\mathbf{z}_1, \dots, \mathbf{z}_n \in \mathbb{S}_d} \log \left( \exp(-\kappa) \sum_{l,m} \exp(\kappa \mathbf{z}_l^\top \mathbf{z}_m) \right) \quad (51)$$

$$= \arg \min_{\mathbf{z}_1, \dots, \mathbf{z}_n \in \mathbb{S}_d} \log \sum_{l,m} \exp(\kappa \mathbf{z}_l^\top \mathbf{z}_m) \quad (52)$$

$$= \arg \min_{\mathbf{z}_1, \dots, \mathbf{z}_n \in \mathbb{S}_d} \mathcal{L}_{\text{Unif}}. \quad (53)$$

□

**Definition 2** (Normalized counting measure). The normalized counting measure associated with a set  $B$  on  $A$  is

$$\nu_B(A) = \frac{|B \cap A|}{|B|} \quad (54)$$

**Definition 3** (Normalized surface area measure on  $\mathbb{S}_d$ ). The normalized surface area measure on the hypersphere  $\mathbb{S}_d \subset \mathbb{R}^d$ , of a subset  $S' \subset \mathbb{S}_d$  is

$$\sigma_d(S') = \frac{\int_{S'} dS}{\int_{\mathbb{S}_d} dS} = A_d^{-1} \int_{S'} dS \quad (55)$$

where  $A_d$  is defined as in Eq. (1), and  $\int dS$  denotes the surface integral on  $\mathbb{S}_d$ .

**Definition 4** (Weak\* convergence of measures [8]). A sequence of Borel measures  $\{\mu_n\}_{n=1}^\infty$  in  $\mathbb{R}^d$  converges weak\* to a Borel measure  $\mu$ , if for all continuous functions  $f : \mathbb{R}^d \rightarrow \mathbb{R}$ ,

$$\lim_{n \rightarrow \infty} \int f(x) d\mu_n(x) = \int f(x) d\mu(x) \quad (56)$$

**Proposition 5** (Minimizer of  $\mathcal{L}_{\text{Unif}}$ ). For each  $n > 0$ , the  $n$  point minimizer of  $\mathcal{L}_{\text{Unif}}$  is

$$\mathbf{z}_1^*, \dots, \mathbf{z}_n^* = \arg \min_{\mathbf{z}_1, \dots, \mathbf{z}_n \in \mathbb{S}_d} \mathcal{L}_{\text{Unif}}. \quad (57)$$

Then  $\nu_{\{\mathbf{z}_1^*, \dots, \mathbf{z}_n^*\}}$  converge weak\* to  $\sigma_d$  as  $n \rightarrow \infty$ .

*Proof.* We have

$$\arg \min_{\mathbf{z}_1, \dots, \mathbf{z}_n \in \mathbb{S}_d} \mathcal{L}_{\text{Unif}} \quad (58)$$

$$= \arg \min_{\mathbf{z}_1, \dots, \mathbf{z}_n \in \mathbb{S}_d} \log \sum_{l, m} \exp(\kappa \mathbf{z}_l^\top \mathbf{z}_m) \quad (59)$$

$$= \arg \min_{\mathbf{z}_1, \dots, \mathbf{z}_n \in \mathbb{S}_d} \sum_{l, m} \exp(\kappa \mathbf{z}_l^\top \mathbf{z}_m) \quad (60)$$

(monotonicity of logarithm)

$$= \arg \min_{\mathbf{z}_1, \dots, \mathbf{z}_n \in \mathbb{S}_d} \sum_{1 \leq l < m \leq n} \exp(\kappa \mathbf{z}_l^\top \mathbf{z}_m) \quad (61)$$

(symmetry of inner product)

$$= \arg \min_{\mathbf{z}_1, \dots, \mathbf{z}_n \in \mathbb{S}_d} \sum_{1 \leq l < m \leq n} \underbrace{\exp(-\kappa \|\mathbf{z}_l - \mathbf{z}_m\|_2^2)}_{=: G(\mathbf{z}_l, \mathbf{z}_m)} \quad (62)$$

(multiplication by positive constant)

$$= \arg \min_{\mathbf{z}_1, \dots, \mathbf{z}_n \in \mathbb{S}_d} \sum_{1 \leq l < m \leq n} G(\mathbf{z}_l, \mathbf{z}_m) \quad (63)$$

The result then follows directly from [8, Proposition 2].  $\square$

## 5. Experiments

### 5.1. Implementation details

This section covers the additional implementation details not provided in the main paper. These include the initialization of the embeddings in Algorithm 1, hyperparameters, additional transformations wherever required, the architectures used, and a note on accessing the code, datasets, and dataset splits.

**Initialization and normalization.** Instead of a random initialization of our embeddings  $Z_0$ , we follow a PCA based initialization, as in [5]. The weights are computed using the cached features from the base classes, the support and query features are then transformed using these weights. This procedure is also fast as we do not need to compute the PCA weights on every episode. To ensure that the resulting features lie on the hypersphere after each gradient update in noHub and noHub-S, we re-normalize the embeddings using L2 normalization.

**Hyperparameters.** noHub and noHub-S have the following hyperparameters.

- $P$  – perplexity for computing the  $\kappa_i$ .

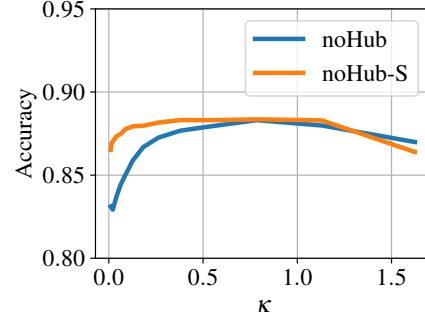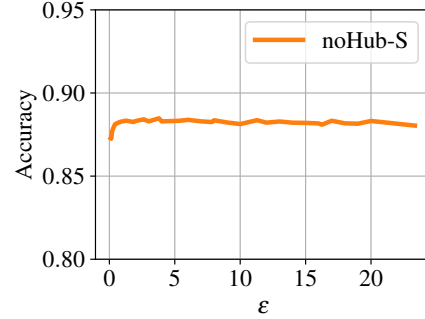

Figure 1. Accuracy for different values for  $\kappa$  and  $\varepsilon$ . Neither noHub nor noHub-S are particularly sensitive to the choice of these parameters.

- $T$  – number of iterations.
- $\alpha$  – tradeoff parameter in the loss ( $\mathcal{L}_{\text{noHub}} = \alpha \mathcal{L}_{\text{LSP}} + (1 - \alpha) \mathcal{L}_{\text{Unif}}$ ).
- $\eta$  – learning rate for the Adam optimizer.
- $\kappa$  – concentration parameter for the embeddings.
- $\varepsilon$  – exaggeration of similarities between supports from different classes.
- $d$  – dimensionality of embeddings.

All hyperparameter values used in noHub and noHub-S are given in Table 1

**Code.** The code for our experiments is available at: <https://github.com/uitml/noHub>

**Data splits.** Details to access the datasets used with the requisite splits (both are consistent with [6]) are available in the code repository.

**Base feature extractors.**

- **Resnet-18:** As in [1, 6], we use the weights from [6]. The model is trained using a cross-entropy loss on the base classes.
- **WideRes28-10:** Following [3, 9], we use the weights from [3]. The model is pre-trained using a combination of cross-entropy and rotation prediction [2], and then fine-tuned with Manifold Mixup [7].

| Arch.        | Param.        | Method  | mini   |        | tiered |        | CUB    |        |
|--------------|---------------|---------|--------|--------|--------|--------|--------|--------|
|              |               |         | 1-shot | 5-shot | 1-shot | 5-shot | 1-shot | 5-shot |
| ResNet18     | $P$           | noHub   | 45     | 45     | 45     | 45     | 45     | 45     |
|              |               | noHub-S | 45     | 45     | 40     | 45     | 45     | 45     |
|              | $T$           | noHub   | 50     | 50     | 50     | 50     | 50     | 50     |
|              |               | noHub-S | 150    | 150    | 150    | 150    | 150    | 150    |
|              | $\alpha$      | noHub   | 0.2    | 0.2    | 0.2    | 0.2    | 0.2    | 0.2    |
|              |               | noHub-S | 0.3    | 0.2    | 0.2    | 0.2    | 0.3    | 0.2    |
|              | $\eta$        | noHub   | 0.1    | 0.1    | 0.1    | 0.1    | 0.1    | 0.1    |
|              |               | noHub-S | 0.1    | 0.1    | 0.1    | 0.1    | 0.1    | 0.1    |
|              | $\kappa$      | noHub   | 0.5    | 0.5    | 0.5    | 0.5    | 0.5    | 0.5    |
|              |               | noHub-S | 0.5    | 0.5    | 0.5    | 0.5    | 0.5    | 0.5    |
|              | $\varepsilon$ | noHub   | –      | –      | –      | –      | –      | –      |
|              |               | noHub-S | 8      | 8      | 5      | 8      | 8      | 8      |
| $d$          | noHub         | 400     | 400    | 400    | 400    | 400    | 400    |        |
|              | noHub-S       | 400     | 400    | 400    | 400    | 400    | 400    |        |
| WideRes28-10 | $P$           | noHub   | 45     | 45     | 45     | 45     | 45     | 45     |
|              |               | noHub-S | 45     | 45     | 40     | 35     | 45     | 30     |
|              | $T$           | noHub   | 50     | 50     | 50     | 50     | 50     | 50     |
|              |               | noHub-S | 150    | 150    | 150    | 150    | 150    | 150    |
|              | $\alpha$      | noHub   | 0.2    | 0.2    | 0.2    | 0.2    | 0.2    | 0.2    |
|              |               | noHub-S | 0.3    | 0.2    | 0.2    | 0.1    | 0.3    | 0.1    |
|              | $\eta$        | noHub   | 0.1    | 0.1    | 0.1    | 0.1    | 0.1    | 0.1    |
|              |               | noHub-S | 0.1    | 0.1    | 0.1    | 0.1    | 0.1    | 0.1    |
|              | $\kappa$      | noHub   | 0.5    | 0.5    | 0.5    | 0.5    | 0.5    | 0.5    |
|              |               | noHub-S | 0.5    | 0.5    | 0.5    | 0.2    | 0.5    | 0.2    |
|              | $\varepsilon$ | noHub   | –      | –      | –      | –      | –      | –      |
|              |               | noHub-S | 8      | 8      | 5      | 12     | 8      | 8      |
| $d$          | noHub         | 400     | 400    | 400    | 400    | 400    | 400    |        |
|              | noHub-S       | 400     | 400    | 400    | 400    | 400    | 400    |        |

Table 1. Hyperparameter values used in our experiments.

## 5.2. Results

**FSL performance.** The complete lists of accuracies and hubness metrics for all embeddings, classifiers, and feature extractors, are given in Tables 2, 3, 4, and 5. The exhaustive results in these tables form the basis of Table 1, Table 2 and Table 3 in the main text. The two proposed approaches consistently outperform prior embeddings across several classifiers, feature extractors and datasets.

**Effect of the  $\kappa$  and  $\varepsilon$  hyperparameters.** The plots in Figure 1 show accuracy on *tiered* 5-shot with SIAMESE for increasing  $\kappa$  and  $\varepsilon$ . Neither method is particularly sensitive to the choice of  $\kappa$  and  $\varepsilon$ , and noHub-S is less sensitive to variations in  $\kappa$ , than noHub. Choosing  $\kappa \in [0.5, 1]$  and  $\varepsilon \in [3, 20]$  will result in high classification accuracy

## 6. Potential Negative Societal Impacts

As is the case with most methodological research in machine learning, the methods developed in this work could be used in downstream applications with potential negative societal impacts. Real world machine learning-based systems that interact with humans, or the environment in general, should therefore be properly tested and equipped with adequate safety measures.

Since our work relies on a large number of labeled examples from the base classes, un-discovered biases from the base dataset could be transferred to the trained models. Furthermore, the small number of examples in the inference stage could make the query predictions biased towards the included support examples, and not accurately reflect the diversity of the novel classes.

| Arch.         | Clf.            | Emb.                | mini                 |                      |                      | tiered               |                      |                      | CUB                  |                      |                      |
|---------------|-----------------|---------------------|----------------------|----------------------|----------------------|----------------------|----------------------|----------------------|----------------------|----------------------|----------------------|
|               |                 |                     | Acc                  | Skew                 | Hub. Occ.            | Acc                  | Skew                 | Hub. Occ.            | Acc                  | Skew                 | Hub. Occ.            |
| ResNet18      | ILPC            | None                | 64.07 (0.28)         | 1.411 (0.01)         | 0.408 (0.001)        | 75.5 (0.28)          | 1.213 (0.009)        | 0.41 (0.001)         | 76.06 (0.27)         | 0.886 (0.006)        | 0.34 (0.001)         |
|               |                 | L2                  | 69.28 (0.27)         | 0.966 (0.007)        | 0.298 (0.001)        | 77.84 (0.28)         | 0.811 (0.007)        | 0.267 (0.001)        | 79.91 (0.26)         | 0.688 (0.006)        | 0.236 (0.001)        |
|               |                 | CL2                 | 71.48 (0.27)         | 0.661 (0.005)        | 0.229 (0.001)        | 79.8 (0.27)          | 0.679 (0.006)        | 0.249 (0.001)        | 80.97 (0.26)         | 0.553 (0.005)        | 0.203 (0.001)        |
|               |                 | ZN                  | 71.48 (0.27)         | 0.677 (0.006)        | 0.227 (0.001)        | 79.95 (0.27)         | 0.694 (0.006)        | 0.263 (0.001)        | 81.49 (0.25)         | 0.57 (0.005)         | 0.217 (0.001)        |
|               |                 | ReRep               | 65.49 (0.28)         | 3.688 (0.007)        | 0.559 (0.001)        | 76.75 (0.28)         | 3.61 (0.01)          | 0.55 (0.001)         | 77.73 (0.26)         | 3.563 (0.007)        | 0.512 (0.001)        |
|               |                 | EASE                | 71.79 (0.28)         | 0.515 (0.005)        | 0.157 (0.001)        | 80.2 (0.27)          | 0.48 (0.005)         | 0.158 (0.001)        | 81.88 (0.25)         | 0.463 (0.004)        | 0.153 (0.001)        |
|               |                 | TCPR                | 71.77 (0.28)         | 0.647 (0.005)        | 0.223 (0.001)        | 80.01 (0.28)         | 0.652 (0.006)        | 0.249 (0.001)        | 81.75 (0.25)         | 0.534 (0.004)        | 0.203 (0.001)        |
|               |                 | noHub               | 73.18 (0.28)         | 0.308 (0.005)        | <b>0.094 (0.001)</b> | 80.76 (0.28)         | 0.296 (0.004)        | <b>0.101 (0.001)</b> | 82.74 (0.26)         | 0.32 (0.004)         | <b>0.112 (0.001)</b> |
|               |                 | noHub-S             | <b>74.02 (0.28)</b>  | <b>0.276 (0.004)</b> | 0.13 (0.001)         | <b>81.34 (0.27)</b>  | <b>0.281 (0.004)</b> | 0.127 (0.001)        | <b>83.92 (0.25)</b>  | <b>0.296 (0.003)</b> | 0.163 (0.001)        |
|               | LaplacianShot   | None                | 68.92 (0.23)         | 1.341 (0.009)        | 0.408 (0.001)        | 76.43 (0.25)         | 1.214 (0.009)        | 0.41 (0.001)         | 79.17 (0.23)         | 0.887 (0.006)        | 0.34 (0.001)         |
|               |                 | L2                  | 69.32 (0.23)         | 0.945 (0.007)        | 0.302 (0.001)        | 77.2 (0.25)          | 0.808 (0.007)        | 0.265 (0.001)        | 79.65 (0.23)         | 0.682 (0.006)        | 0.236 (0.001)        |
|               |                 | CL2                 | 70.68 (0.23)         | 0.661 (0.005)        | 0.231 (0.001)        | 77.98 (0.24)         | 0.689 (0.006)        | 0.248 (0.001)        | 79.99 (0.22)         | 0.547 (0.005)        | 0.201 (0.001)        |
|               |                 | ZN                  | 70.51 (0.23)         | 0.688 (0.006)        | 0.233 (0.001)        | 77.51 (0.24)         | 0.697 (0.006)        | 0.264 (0.001)        | 79.86 (0.22)         | 0.564 (0.005)        | 0.217 (0.001)        |
|               |                 | ReRep               | 72.75 (0.24)         | 3.653 (0.007)        | 0.548 (0.001)        | 78.95 (0.25)         | 3.605 (0.011)        | 0.549 (0.001)        | 82.38 (0.22)         | 3.565 (0.007)        | 0.512 (0.001)        |
|               |                 | EASE                | 72.19 (0.23)         | 0.526 (0.005)        | 0.161 (0.001)        | 79.34 (0.24)         | 0.481 (0.005)        | 0.158 (0.001)        | 81.5 (0.22)          | 0.459 (0.004)        | 0.152 (0.001)        |
|               |                 | TCPR                | 71.79 (0.23)         | 0.654 (0.005)        | 0.228 (0.001)        | 78.41 (0.24)         | 0.651 (0.005)        | 0.249 (0.001)        | 80.86 (0.22)         | 0.537 (0.004)        | 0.203 (0.001)        |
|               |                 | noHub               | 73.63 (0.25)         | 0.305 (0.005)        | <b>0.094 (0.001)</b> | <b>80.84 (0.25)</b>  | 0.3 (0.005)          | <b>0.101 (0.001)</b> | 83.23 (0.22)         | 0.318 (0.004)        | <b>0.112 (0.001)</b> |
|               |                 | noHub-S             | <b>73.79 (0.25)</b>  | <b>0.276 (0.004)</b> | 0.13 (0.001)         | 80.83 (0.25)         | <b>0.275 (0.004)</b> | 0.125 (0.001)        | <b>83.47 (0.22)</b>  | <b>0.299 (0.003)</b> | 0.164 (0.001)        |
|               | ObliqueManifold | None                | 68.89 (0.23)         | 1.412 (0.01)         | 0.407 (0.001)        | 77.07 (0.25)         | 1.21 (0.009)         | 0.409 (0.001)        | 79.4 (0.22)          | 0.887 (0.006)        | 0.341 (0.001)        |
|               |                 | L2                  | 68.92 (0.23)         | 0.964 (0.007)        | 0.299 (0.001)        | 77.17 (0.25)         | 0.806 (0.007)        | 0.266 (0.001)        | 79.32 (0.22)         | 0.691 (0.006)        | 0.237 (0.001)        |
|               |                 | CL2                 | 70.86 (0.24)         | 0.66 (0.005)         | 0.228 (0.001)        | 78.92 (0.25)         | 0.68 (0.006)         | 0.249 (0.001)        | 80.29 (0.23)         | 0.547 (0.005)        | 0.202 (0.001)        |
|               |                 | ZN                  | 71.25 (0.24)         | 0.679 (0.006)        | 0.227 (0.001)        | 79.54 (0.25)         | 0.697 (0.006)        | 0.263 (0.001)        | 81.38 (0.23)         | 0.562 (0.005)        | 0.216 (0.001)        |
|               |                 | ReRep               | 73.3 (0.25)          | 3.682 (0.007)        | 0.559 (0.001)        | 80.26 (0.26)         | 3.608 (0.01)         | 0.551 (0.001)        | <b>83.84 (0.23)</b>  | 3.559 (0.008)        | 0.513 (0.001)        |
|               |                 | EASE                | 68.4 (0.24)          | 0.516 (0.005)        | 0.156 (0.001)        | 77.33 (0.25)         | 0.477 (0.004)        | 0.158 (0.001)        | 79.03 (0.24)         | 0.461 (0.004)        | 0.152 (0.001)        |
|               |                 | TCPR                | 70.74 (0.24)         | 0.646 (0.005)        | 0.223 (0.001)        | 78.92 (0.25)         | 0.649 (0.005)        | 0.249 (0.001)        | 80.18 (0.23)         | 0.537 (0.004)        | 0.204 (0.001)        |
|               |                 | noHub               | 72.55 (0.26)         | 0.309 (0.005)        | <b>0.095 (0.001)</b> | 79.97 (0.26)         | 0.302 (0.005)        | <b>0.102 (0.001)</b> | 82.21 (0.24)         | 0.319 (0.004)        | <b>0.112 (0.001)</b> |
|               |                 | noHub-S             | <b>74.24 (0.26)</b>  | <b>0.274 (0.004)</b> | 0.13 (0.001)         | <b>80.84 (0.26)</b>  | <b>0.282 (0.004)</b> | 0.127 (0.001)        | 83.67 (0.23)         | <b>0.294 (0.003)</b> | 0.162 (0.001)        |
|               | SIAMESE         | None                | 20.0 (0.0)           | 1.345 (0.009)        | 0.407 (0.001)        | 20.0 (0.0)           | 1.222 (0.009)        | 0.41 (0.001)         | 20.0 (0.0)           | 0.885 (0.006)        | 0.339 (0.001)        |
|               |                 | L2                  | 73.77 (0.24)         | 0.949 (0.007)        | 0.301 (0.001)        | 80.46 (0.26)         | 0.811 (0.007)        | 0.265 (0.001)        | 83.1 (0.23)          | 0.691 (0.006)        | 0.237 (0.001)        |
|               |                 | CL2                 | 75.56 (0.26)         | 0.666 (0.005)        | 0.232 (0.001)        | 82.1 (0.26)          | 0.68 (0.006)         | 0.248 (0.001)        | 84.35 (0.24)         | 0.549 (0.005)        | 0.201 (0.001)        |
|               |                 | ZN                  | 20.0 (0.0)           | 0.686 (0.006)        | 0.232 (0.001)        | 20.0 (0.0)           | 0.69 (0.006)         | 0.262 (0.001)        | 20.0 (0.0)           | 0.565 (0.005)        | 0.217 (0.001)        |
|               |                 | ReRep               | 20.0 (0.0)           | 3.653 (0.007)        | 0.549 (0.001)        | 20.0 (0.0)           | 3.616 (0.01)         | 0.549 (0.001)        | 20.0 (0.0)           | 3.559 (0.007)        | 0.512 (0.001)        |
|               |                 | EASE                | 76.05 (0.27)         | 0.529 (0.005)        | 0.162 (0.001)        | 82.57 (0.27)         | 0.485 (0.005)        | 0.159 (0.001)        | 85.24 (0.24)         | 0.464 (0.004)        | 0.153 (0.001)        |
|               |                 | TCPR                | 75.99 (0.26)         | 0.655 (0.005)        | 0.227 (0.001)        | 82.65 (0.26)         | 0.651 (0.005)        | 0.249 (0.001)        | 85.34 (0.23)         | 0.535 (0.004)        | 0.203 (0.001)        |
|               |                 | noHub               | 76.65 (0.28)         | 0.308 (0.005)        | <b>0.095 (0.001)</b> | 82.94 (0.27)         | 0.303 (0.004)        | <b>0.101 (0.001)</b> | <b>85.88 (0.24)</b>  | 0.322 (0.004)        | <b>0.112 (0.001)</b> |
|               |                 | noHub-S             | <b>76.68 (0.28)</b>  | <b>0.275 (0.004)</b> | 0.13 (0.001)         | <b>83.09 (0.27)</b>  | <b>0.281 (0.004)</b> | 0.128 (0.001)        | 85.81 (0.24)         | <b>0.295 (0.003)</b> | 0.161 (0.001)        |
| SimpleShot    | None            | 56.14 (0.2)         | 1.349 (0.009)        | 0.407 (0.001)        | 63.34 (0.23)         | 1.211 (0.009)        | 0.408 (0.001)        | 64.02 (0.21)         | 0.887 (0.006)        | 0.341 (0.001)        |                      |
|               | L2              | 60.15 (0.2)         | 0.937 (0.007)        | 0.301 (0.001)        | 68.02 (0.23)         | 0.812 (0.007)        | 0.265 (0.001)        | 69.05 (0.21)         | 0.691 (0.006)        | 0.236 (0.001)        |                      |
|               | CL2             | 63.1 (0.2)          | 0.667 (0.005)        | 0.233 (0.001)        | 69.76 (0.22)         | 0.679 (0.006)        | 0.249 (0.001)        | 70.16 (0.2)          | 0.549 (0.005)        | 0.201 (0.001)        |                      |
|               | ZN              | 63.39 (0.2)         | 0.68 (0.005)         | 0.231 (0.001)        | 70.04 (0.22)         | 0.698 (0.006)        | 0.264 (0.001)        | 71.03 (0.2)          | 0.564 (0.005)        | 0.216 (0.001)        |                      |
|               | ReRep           | 66.66 (0.22)        | 3.655 (0.007)        | 0.548 (0.001)        | 73.23 (0.23)         | 3.604 (0.01)         | 0.549 (0.001)        | 76.8 (0.21)          | 3.565 (0.007)        | 0.513 (0.001)        |                      |
|               | EASE            | 64.0 (0.2)          | 0.521 (0.005)        | 0.16 (0.001)         | 71.0 (0.21)          | 0.479 (0.005)        | 0.158 (0.001)        | 72.38 (0.2)          | 0.466 (0.004)        | 0.153 (0.001)        |                      |
|               | TCPR            | 63.33 (0.2)         | 0.651 (0.005)        | 0.228 (0.001)        | 69.82 (0.22)         | 0.65 (0.005)         | 0.25 (0.001)         | 70.75 (0.2)          | 0.532 (0.004)        | 0.204 (0.001)        |                      |
|               | noHub           | 69.38 (0.22)        | 0.315 (0.005)        | <b>0.095 (0.001)</b> | 76.72 (0.23)         | 0.303 (0.004)        | <b>0.102 (0.001)</b> | 78.21 (0.21)         | 0.32 (0.004)         | <b>0.112 (0.001)</b> |                      |
|               | noHub-S         | <b>71.1 (0.22)</b>  | <b>0.276 (0.004)</b> | 0.13 (0.001)         | <b>78.35 (0.23)</b>  | <b>0.283 (0.004)</b> | 0.127 (0.001)        | <b>80.31 (0.21)</b>  | <b>0.296 (0.003)</b> | 0.162 (0.001)        |                      |
| $\alpha$ -TIM | None            | 56.39 (0.2)         | 1.342 (0.009)        | 0.406 (0.001)        | 63.32 (0.23)         | 1.216 (0.009)        | 0.411 (0.001)        | 64.02 (0.22)         | 0.886 (0.006)        | 0.341 (0.001)        |                      |
|               | L2              | 67.91 (0.23)        | 0.942 (0.007)        | 0.301 (0.001)        | 74.94 (0.24)         | 0.814 (0.007)        | 0.266 (0.001)        | 77.49 (0.23)         | 0.694 (0.006)        | 0.236 (0.001)        |                      |
|               | CL2             | 65.68 (0.21)        | 0.665 (0.005)        | 0.232 (0.001)        | 73.23 (0.23)         | 0.681 (0.006)        | 0.248 (0.001)        | 73.79 (0.21)         | 0.552 (0.005)        | 0.202 (0.001)        |                      |
|               | ZN              | 63.36 (0.2)         | 0.682 (0.005)        | 0.232 (0.001)        | 70.19 (0.22)         | 0.693 (0.006)        | 0.263 (0.001)        | 70.85 (0.21)         | 0.566 (0.005)        | 0.215 (0.001)        |                      |
|               | ReRep           | 66.37 (0.22)        | 3.656 (0.007)        | 0.55 (0.001)         | 73.24 (0.24)         | 3.605 (0.011)        | 0.55 (0.001)         | 76.86 (0.21)         | 3.555 (0.007)        | 0.514 (0.001)        |                      |
|               | EASE            | 65.32 (0.2)         | 0.526 (0.005)        | 0.163 (0.001)        | 71.88 (0.22)         | 0.477 (0.005)        | 0.158 (0.001)        | 73.03 (0.21)         | 0.459 (0.004)        | 0.151 (0.001)        |                      |
|               | TCPR            | 66.19 (0.21)        | 0.65 (0.005)         | 0.227 (0.001)        | 73.24 (0.23)         | 0.649 (0.005)        | 0.25 (0.001)         | 74.07 (0.21)         | 0.532 (0.004)        | 0.203 (0.001)        |                      |
|               | noHub           | 70.08 (0.23)        | 0.312 (0.005)        | <b>0.094 (0.001)</b> | 77.39 (0.24)         | 0.304 (0.004)        | <b>0.101 (0.001)</b> | 79.19 (0.22)         | 0.319 (0.004)        | <b>0.112 (0.001)</b> |                      |
|               | noHub-S         | <b>72.04 (0.23)</b> | <b>0.273 (0.004)</b> | 0.13 (0.001)         | <b>79.13 (0.24)</b>  | <b>0.282 (0.004)</b> | 0.126 (0.001)        | <b>81.42 (0.22)</b>  | <b>0.296 (0.003)</b> | 0.161 (0.001)        |                      |

Table 2. Resnet-18: 1-shot.

| Arch.           | Clf.    | Emb. | mini                |                      |                      | tiered              |                      |                      | CUB                 |                      |                      |
|-----------------|---------|------|---------------------|----------------------|----------------------|---------------------|----------------------|----------------------|---------------------|----------------------|----------------------|
|                 |         |      | Acc                 | Skew                 | Hub. Occ.            | Acc                 | Skew                 | Hub. Occ.            | Acc                 | Skew                 | Hub. Occ.            |
| ILPC            | None    |      | 71.27 (0.28)        | 1.595 (0.01)         | 0.46 (0.001)         | 75.01 (0.28)        | 1.807 (0.01)         | 0.494 (0.001)        | 89.75 (0.19)        | 1.072 (0.009)        | 0.367 (0.001)        |
|                 | L2      |      | 76.41 (0.26)        | 0.773 (0.006)        | 0.295 (0.001)        | 78.25 (0.27)        | 0.731 (0.006)        | 0.274 (0.001)        | 90.27 (0.2)         | 0.473 (0.004)        | 0.228 (0.001)        |
|                 | CL2     |      | 74.13 (0.27)        | 0.993 (0.009)        | 0.29 (0.001)         | 78.2 (0.27)         | 0.815 (0.006)        | 0.306 (0.001)        | 90.34 (0.2)         | 0.524 (0.004)        | 0.267 (0.001)        |
|                 | ZN      |      | 77.76 (0.26)        | 0.728 (0.005)        | 0.287 (0.001)        | 79.42 (0.27)        | 0.776 (0.006)        | 0.302 (0.001)        | 90.21 (0.2)         | 0.516 (0.004)        | 0.263 (0.001)        |
|                 | ReRep   |      | 62.51 (0.34)        | 3.56 (0.002)         | 0.704 (0.001)        | 60.66 (0.37)        | 3.55 (0.002)         | 0.776 (0.001)        | 87.44 (0.25)        | 3.033 (0.008)        | 0.472 (0.001)        |
|                 | EASE    |      | 78.01 (0.26)        | 0.47 (0.004)         | 0.176 (0.001)        | 79.64 (0.27)        | 0.479 (0.004)        | 0.175 (0.001)        | 90.76 (0.19)        | 0.437 (0.003)        | 0.212 (0.001)        |
|                 | TCPR    |      | 78.37 (0.26)        | 0.584 (0.005)        | 0.237 (0.001)        | 79.55 (0.28)        | 0.683 (0.006)        | 0.265 (0.001)        | 90.77 (0.19)        | 0.476 (0.004)        | 0.23 (0.001)         |
|                 | noHub   |      | 78.84 (0.27)        | 0.293 (0.004)        | <b>0.112 (0.001)</b> | 80.75 (0.28)        | 0.3 (0.004)          | <b>0.112 (0.001)</b> | 90.91 (0.2)         | 0.189 (0.004)        | <b>0.109 (0.001)</b> |
|                 | noHub-S |      | <b>79.77 (0.26)</b> | <b>0.262 (0.004)</b> | 0.148 (0.001)        | <b>81.24 (0.27)</b> | <b>0.278 (0.004)</b> | 0.135 (0.001)        | <b>91.28 (0.19)</b> | <b>0.16 (0.004)</b>  | 0.13 (0.001)         |
| LaplacianShot   | None    |      | 72.56 (0.23)        | 1.599 (0.01)         | 0.459 (0.001)        | 75.58 (0.25)        | 1.795 (0.01)         | 0.495 (0.001)        | 88.71 (0.19)        | 1.071 (0.009)        | 0.369 (0.001)        |
|                 | L2      |      | 75.18 (0.23)        | 0.777 (0.006)        | 0.296 (0.001)        | 77.03 (0.24)        | 0.732 (0.006)        | 0.274 (0.001)        | 89.73 (0.17)        | 0.474 (0.004)        | 0.229 (0.001)        |
|                 | CL2     |      | 71.29 (0.24)        | 0.987 (0.009)        | 0.29 (0.001)         | 75.42 (0.25)        | 0.819 (0.006)        | 0.309 (0.001)        | 89.61 (0.18)        | 0.52 (0.004)         | 0.268 (0.001)        |
|                 | ZN      |      | 75.18 (0.22)        | 0.724 (0.005)        | 0.286 (0.001)        | 77.0 (0.24)         | 0.768 (0.006)        | 0.301 (0.001)        | 89.22 (0.18)        | 0.517 (0.004)        | 0.263 (0.001)        |
|                 | ReRep   |      | 75.25 (0.22)        | 3.562 (0.002)        | 0.704 (0.001)        | 77.12 (0.24)        | 3.548 (0.002)        | 0.776 (0.001)        | 88.98 (0.18)        | 3.024 (0.008)        | 0.47 (0.001)         |
|                 | EASE    |      | 77.29 (0.22)        | 0.473 (0.004)        | 0.177 (0.001)        | 78.97 (0.24)        | 0.475 (0.004)        | 0.175 (0.001)        | 90.06 (0.17)        | 0.435 (0.003)        | 0.213 (0.001)        |
|                 | TCPR    |      | 76.77 (0.22)        | 0.593 (0.005)        | 0.236 (0.001)        | 77.49 (0.24)        | 0.686 (0.006)        | 0.264 (0.001)        | 89.42 (0.17)        | 0.475 (0.004)        | 0.231 (0.001)        |
|                 | noHub   |      | <b>79.13 (0.23)</b> | 0.29 (0.004)         | <b>0.111 (0.001)</b> | 80.5 (0.25)         | 0.302 (0.004)        | <b>0.112 (0.001)</b> | <b>90.73 (0.18)</b> | 0.19 (0.004)         | <b>0.109 (0.001)</b> |
|                 | noHub-S |      | 79.13 (0.23)        | <b>0.259 (0.004)</b> | 0.147 (0.001)        | <b>80.59 (0.24)</b> | <b>0.277 (0.004)</b> | 0.135 (0.001)        | 90.61 (0.17)        | <b>0.164 (0.004)</b> | 0.13 (0.001)         |
| ObliqueManifold | None    |      | 76.02 (0.22)        | 1.599 (0.01)         | 0.46 (0.001)         | 77.75 (0.25)        | 1.801 (0.01)         | 0.494 (0.001)        | 90.82 (0.18)        | 1.07 (0.009)         | 0.368 (0.001)        |
|                 | L2      |      | 76.11 (0.22)        | 0.779 (0.006)        | 0.295 (0.001)        | 77.03 (0.25)        | 0.731 (0.006)        | 0.274 (0.001)        | 90.89 (0.18)        | 0.475 (0.004)        | 0.229 (0.001)        |
|                 | CL2     |      | 74.43 (0.24)        | 0.985 (0.009)        | 0.289 (0.001)        | 77.98 (0.25)        | 0.816 (0.007)        | 0.307 (0.001)        | 90.6 (0.18)         | 0.523 (0.004)        | 0.267 (0.001)        |
|                 | ZN      |      | 77.69 (0.23)        | 0.724 (0.005)        | 0.286 (0.001)        | 79.32 (0.24)        | 0.767 (0.006)        | 0.301 (0.001)        | 90.73 (0.18)        | 0.519 (0.004)        | 0.263 (0.001)        |
|                 | ReRep   |      | 78.08 (0.23)        | 3.56 (0.002)         | 0.703 (0.001)        | 79.46 (0.25)        | 3.549 (0.002)        | 0.777 (0.001)        | 91.16 (0.18)        | 3.032 (0.008)        | 0.471 (0.001)        |
|                 | EASE    |      | 74.77 (0.23)        | 0.472 (0.004)        | 0.178 (0.001)        | 77.07 (0.25)        | 0.473 (0.004)        | 0.174 (0.001)        | 89.2 (0.18)         | 0.439 (0.003)        | 0.212 (0.001)        |
|                 | TCPR    |      | 77.39 (0.23)        | 0.587 (0.005)        | 0.236 (0.001)        | 78.75 (0.24)        | 0.687 (0.006)        | 0.265 (0.001)        | 89.93 (0.19)        | 0.474 (0.004)        | 0.23 (0.001)         |
|                 | noHub   |      | 78.44 (0.24)        | 0.292 (0.004)        | <b>0.112 (0.001)</b> | 79.99 (0.26)        | 0.302 (0.004)        | <b>0.113 (0.001)</b> | 90.59 (0.19)        | 0.185 (0.004)        | <b>0.108 (0.001)</b> |
|                 | noHub-S |      | <b>79.89 (0.24)</b> | <b>0.259 (0.004)</b> | 0.148 (0.001)        | <b>80.67 (0.26)</b> | <b>0.279 (0.004)</b> | 0.137 (0.001)        | <b>91.37 (0.18)</b> | <b>0.162 (0.004)</b> | 0.13 (0.001)         |
| SIAMESE         | None    |      | 45.69 (0.31)        | 1.594 (0.009)        | 0.459 (0.001)        | 75.29 (0.28)        | 1.801 (0.01)         | 0.495 (0.001)        | 61.36 (0.55)        | 1.074 (0.009)        | 0.37 (0.001)         |
|                 | L2      |      | 80.2 (0.23)         | 0.776 (0.006)        | 0.296 (0.001)        | 80.89 (0.26)        | 0.735 (0.006)        | 0.275 (0.001)        | 91.98 (0.18)        | 0.476 (0.004)        | 0.23 (0.001)         |
|                 | CL2     |      | 75.23 (0.27)        | 0.988 (0.009)        | 0.289 (0.001)        | 79.59 (0.27)        | 0.82 (0.006)         | 0.307 (0.001)        | 92.17 (0.18)        | 0.518 (0.004)        | 0.266 (0.001)        |
|                 | ZN      |      | 20.0 (0.0)          | 0.726 (0.005)        | 0.286 (0.001)        | 20.0 (0.0)          | 0.775 (0.006)        | 0.302 (0.001)        | 20.0 (0.0)          | 0.517 (0.004)        | 0.264 (0.001)        |
|                 | ReRep   |      | 36.69 (0.28)        | 3.561 (0.002)        | 0.705 (0.001)        | 67.41 (0.29)        | 3.55 (0.002)         | 0.776 (0.001)        | 57.62 (0.56)        | 3.027 (0.008)        | 0.472 (0.001)        |
|                 | EASE    |      | 81.19 (0.25)        | 0.474 (0.004)        | 0.178 (0.001)        | 82.04 (0.26)        | 0.476 (0.004)        | 0.176 (0.001)        | 91.99 (0.19)        | 0.436 (0.003)        | 0.213 (0.001)        |
|                 | TCPR    |      | 81.27 (0.24)        | 0.582 (0.005)        | 0.236 (0.001)        | 81.89 (0.26)        | 0.681 (0.006)        | 0.264 (0.001)        | 91.91 (0.18)        | 0.477 (0.004)        | 0.232 (0.001)        |
|                 | noHub   |      | 81.97 (0.25)        | 0.291 (0.004)        | <b>0.111 (0.001)</b> | 82.8 (0.27)         | 0.298 (0.004)        | <b>0.112 (0.001)</b> | 92.53 (0.18)        | 0.189 (0.004)        | <b>0.109 (0.001)</b> |
|                 | noHub-S |      | <b>82.0 (0.26)</b>  | <b>0.258 (0.004)</b> | 0.148 (0.001)        | <b>82.85 (0.27)</b> | <b>0.278 (0.004)</b> | 0.137 (0.001)        | <b>92.63 (0.18)</b> | <b>0.159 (0.004)</b> | 0.13 (0.001)         |
| SimpleShot      | None    |      | 55.66 (0.21)        | 1.6 (0.01)           | 0.459 (0.001)        | 54.71 (0.22)        | 1.81 (0.01)          | 0.494 (0.001)        | 70.92 (0.23)        | 1.073 (0.009)        | 0.369 (0.001)        |
|                 | L2      |      | 65.78 (0.2)         | 0.781 (0.006)        | 0.296 (0.001)        | 68.75 (0.22)        | 0.737 (0.006)        | 0.275 (0.001)        | 82.85 (0.19)        | 0.475 (0.004)        | 0.228 (0.001)        |
|                 | CL2     |      | 64.33 (0.2)         | 0.981 (0.009)        | 0.288 (0.001)        | 67.66 (0.22)        | 0.817 (0.006)        | 0.307 (0.001)        | 82.8 (0.19)         | 0.52 (0.004)         | 0.267 (0.001)        |
|                 | ZN      |      | 67.31 (0.2)         | 0.73 (0.005)         | 0.287 (0.001)        | 69.14 (0.22)        | 0.769 (0.006)        | 0.302 (0.001)        | 82.79 (0.19)        | 0.517 (0.004)        | 0.263 (0.001)        |
|                 | ReRep   |      | 67.38 (0.2)         | 3.56 (0.002)         | 0.704 (0.001)        | 70.17 (0.22)        | 3.55 (0.002)         | 0.777 (0.001)        | 84.86 (0.19)        | 3.026 (0.008)        | 0.47 (0.001)         |
|                 | EASE    |      | 68.62 (0.2)         | 0.47 (0.004)         | 0.177 (0.001)        | 70.26 (0.21)        | 0.477 (0.004)        | 0.175 (0.001)        | 84.14 (0.18)        | 0.437 (0.003)        | 0.213 (0.001)        |
|                 | TCPR    |      | 68.45 (0.2)         | 0.589 (0.005)        | 0.236 (0.001)        | 68.68 (0.22)        | 0.685 (0.006)        | 0.264 (0.001)        | 82.28 (0.19)        | 0.477 (0.004)        | 0.231 (0.001)        |
|                 | noHub   |      | 75.06 (0.21)        | 0.29 (0.004)         | <b>0.111 (0.001)</b> | 76.7 (0.23)         | 0.301 (0.004)        | <b>0.111 (0.001)</b> | 88.06 (0.18)        | 0.188 (0.004)        | <b>0.108 (0.001)</b> |
|                 | noHub-S |      | <b>76.86 (0.21)</b> | <b>0.258 (0.004)</b> | 0.148 (0.001)        | <b>78.4 (0.23)</b>  | <b>0.274 (0.004)</b> | 0.135 (0.001)        | <b>89.25 (0.18)</b> | <b>0.162 (0.004)</b> | 0.13 (0.001)         |
| $\alpha$ -TIM   | None    |      | 60.31 (0.2)         | 1.603 (0.01)         | 0.458 (0.001)        | 69.42 (0.25)        | 1.811 (0.01)         | 0.494 (0.001)        | 73.83 (0.21)        | 1.072 (0.009)        | 0.369 (0.001)        |
|                 | L2      |      | 72.11 (0.22)        | 0.778 (0.006)        | 0.295 (0.001)        | 74.45 (0.23)        | 0.73 (0.006)         | 0.275 (0.001)        | 85.96 (0.19)        | 0.476 (0.004)        | 0.229 (0.001)        |
|                 | CL2     |      | 68.5 (0.21)         | 0.988 (0.009)        | 0.29 (0.001)         | 72.17 (0.23)        | 0.811 (0.006)        | 0.306 (0.001)        | 85.6 (0.18)         | 0.522 (0.004)        | 0.267 (0.001)        |
|                 | ZN      |      | 67.69 (0.2)         | 0.73 (0.005)         | 0.287 (0.001)        | 68.94 (0.22)        | 0.769 (0.006)        | 0.302 (0.001)        | 83.03 (0.19)        | 0.518 (0.004)        | 0.263 (0.001)        |
|                 | ReRep   |      | 73.15 (0.23)        | 3.56 (0.002)         | 0.704 (0.001)        | 76.19 (0.25)        | 3.551 (0.002)        | 0.778 (0.001)        | 88.55 (0.18)        | 3.027 (0.008)        | 0.472 (0.001)        |
|                 | EASE    |      | 69.83 (0.2)         | 0.468 (0.004)        | 0.176 (0.001)        | 71.54 (0.22)        | 0.481 (0.004)        | 0.175 (0.001)        | 84.9 (0.19)         | 0.436 (0.003)        | 0.213 (0.001)        |
|                 | TCPR    |      | 71.6 (0.21)         | 0.586 (0.005)        | 0.237 (0.001)        | 72.71 (0.22)        | 0.689 (0.006)        | 0.264 (0.001)        | 84.99 (0.19)        | 0.479 (0.004)        | 0.231 (0.001)        |
|                 | noHub   |      | 75.87 (0.22)        | 0.29 (0.004)         | <b>0.111 (0.001)</b> | 77.83 (0.23)        | 0.302 (0.004)        | <b>0.112 (0.001)</b> | 88.7 (0.17)         | 0.189 (0.004)        | <b>0.108 (0.001)</b> |
|                 | noHub-S |      | <b>77.76 (0.22)</b> | <b>0.259 (0.004)</b> | 0.147 (0.001)        | <b>79.04 (0.24)</b> | <b>0.276 (0.004)</b> | 0.136 (0.001)        | <b>89.77 (0.17)</b> | <b>0.163 (0.003)</b> | 0.13 (0.001)         |

Table 3. WideRes28-10: 1-shot.

| Arch.         | Clf.            | Emb.                | mini                 |                      |                      | tiered               |                      |                      | CUB                  |                      |                      |
|---------------|-----------------|---------------------|----------------------|----------------------|----------------------|----------------------|----------------------|----------------------|----------------------|----------------------|----------------------|
|               |                 |                     | Acc                  | Skew                 | Hub. Occ.            | Acc                  | Skew                 | Hub. Occ.            | Acc                  | Skew                 | Hub. Occ.            |
| ResNet18      | ILPC            | None                | 76.46 (0.18)         | 1.503 (0.01)         | 0.421 (0.001)        | 84.46 (0.18)         | 1.334 (0.008)        | 0.433 (0.001)        | 85.86 (0.14)         | 0.981 (0.005)        | 0.364 (0.001)        |
|               |                 | L2                  | 80.9 (0.16)          | 1.051 (0.007)        | 0.314 (0.001)        | 86.23 (0.17)         | 0.912 (0.006)        | 0.289 (0.001)        | 88.03 (0.13)         | 0.808 (0.005)        | 0.264 (0.001)        |
|               |                 | CL2                 | 81.64 (0.16)         | 0.778 (0.005)        | 0.262 (0.001)        | 86.88 (0.17)         | 0.823 (0.006)        | 0.281 (0.001)        | 88.44 (0.13)         | 0.695 (0.005)        | 0.235 (0.001)        |
|               |                 | ZN                  | 81.61 (0.16)         | 0.793 (0.005)        | 0.258 (0.001)        | 86.9 (0.17)          | 0.841 (0.006)        | 0.297 (0.001)        | 88.44 (0.12)         | 0.717 (0.004)        | 0.25 (0.001)         |
|               |                 | ReRep               | 74.83 (0.19)         | 1.623 (0.003)        | 0.871 (0.001)        | 83.96 (0.19)         | 1.722 (0.004)        | 0.873 (0.001)        | 84.54 (0.15)         | 1.432 (0.003)        | 0.869 (0.001)        |
|               |                 | EASE                | 81.75 (0.16)         | 0.618 (0.005)        | 0.182 (0.001)        | 86.84 (0.17)         | 0.593 (0.004)        | 0.181 (0.001)        | 88.85 (0.12)         | 0.606 (0.004)        | 0.186 (0.001)        |
|               |                 | TCPR                | 81.76 (0.16)         | 0.766 (0.005)        | 0.254 (0.001)        | 86.78 (0.17)         | 0.801 (0.005)        | 0.284 (0.001)        | 88.69 (0.13)         | 0.683 (0.004)        | 0.237 (0.001)        |
|               |                 | noHub               | 82.09 (0.16)         | <b>0.295 (0.004)</b> | 0.097 (0.001)        | 86.81 (0.17)         | <b>0.289 (0.004)</b> | 0.102 (0.001)        | 88.85 (0.13)         | <b>0.333 (0.004)</b> | 0.12 (0.001)         |
|               |                 | noHub-S             | <b>82.33 (0.16)</b>  | 0.488 (0.006)        | <b>0.086 (0.001)</b> | <b>87.05 (0.17)</b>  | 0.475 (0.006)        | <b>0.091 (0.001)</b> | <b>89.12 (0.13)</b>  | 0.438 (0.006)        | <b>0.097 (0.001)</b> |
|               | LaplacianShot   | None                | 81.97 (0.15)         | 1.442 (0.009)        | 0.422 (0.001)        | 86.17 (0.16)         | 1.336 (0.008)        | 0.432 (0.001)        | 88.58 (0.12)         | 0.985 (0.005)        | 0.365 (0.001)        |
|               |                 | L2                  | 81.89 (0.14)         | 1.035 (0.007)        | 0.319 (0.001)        | 86.19 (0.16)         | 0.913 (0.006)        | 0.289 (0.001)        | 88.52 (0.11)         | 0.811 (0.005)        | 0.264 (0.001)        |
|               |                 | CL2                 | 81.93 (0.14)         | 0.786 (0.005)        | 0.265 (0.001)        | 86.16 (0.16)         | 0.82 (0.006)         | 0.282 (0.001)        | 88.46 (0.12)         | 0.7 (0.005)          | 0.235 (0.001)        |
|               |                 | ZN                  | 82.57 (0.14)         | 0.803 (0.005)        | 0.263 (0.001)        | 86.67 (0.16)         | 0.838 (0.006)        | 0.296 (0.001)        | 88.88 (0.11)         | 0.714 (0.004)        | 0.25 (0.001)         |
|               |                 | ReRep               | 82.32 (0.14)         | 1.633 (0.003)        | 0.863 (0.001)        | 86.09 (0.16)         | 1.721 (0.004)        | 0.873 (0.001)        | 88.74 (0.12)         | 1.431 (0.002)        | 0.869 (0.001)        |
|               |                 | EASE                | 82.57 (0.14)         | 0.627 (0.005)        | 0.186 (0.001)        | 86.82 (0.15)         | 0.596 (0.004)        | 0.182 (0.001)        | 88.94 (0.11)         | 0.608 (0.004)        | 0.185 (0.001)        |
|               |                 | TCPR                | 82.24 (0.14)         | 0.781 (0.005)        | 0.259 (0.001)        | 86.27 (0.16)         | 0.797 (0.005)        | 0.284 (0.001)        | 88.63 (0.11)         | 0.687 (0.004)        | 0.236 (0.001)        |
|               |                 | noHub               | 82.55 (0.15)         | 0.285 (0.004)        | 0.096 (0.001)        | 86.75 (0.16)         | 0.29 (0.004)         | 0.103 (0.001)        | <b>89.08 (0.11)</b>  | <b>0.329 (0.004)</b> | 0.12 (0.001)         |
|               |                 | noHub-S             | <b>82.81 (0.14)</b>  | <b>0.25 (0.005)</b>  | <b>0.073 (0.001)</b> | <b>87.12 (0.16)</b>  | <b>0.214 (0.005)</b> | <b>0.077 (0.001)</b> | 88.99 (0.11)         | 0.438 (0.006)        | <b>0.096 (0.001)</b> |
|               | ObliqueManifold | None                | 83.53 (0.15)         | 1.497 (0.01)         | 0.421 (0.001)        | 87.85 (0.15)         | 1.334 (0.009)        | 0.433 (0.001)        | 90.28 (0.11)         | 0.987 (0.005)        | 0.364 (0.001)        |
|               |                 | L2                  | 83.66 (0.15)         | 1.051 (0.007)        | 0.314 (0.001)        | 87.83 (0.15)         | 0.922 (0.006)        | 0.289 (0.001)        | 90.21 (0.11)         | 0.81 (0.005)         | 0.263 (0.001)        |
|               |                 | CL2                 | 83.62 (0.15)         | 0.775 (0.005)        | 0.261 (0.001)        | 88.1 (0.15)          | 0.823 (0.006)        | 0.281 (0.001)        | 90.09 (0.11)         | 0.701 (0.005)        | 0.236 (0.001)        |
|               |                 | ZN                  | <b>83.86 (0.15)</b>  | 0.795 (0.005)        | 0.258 (0.001)        | <b>88.47 (0.15)</b>  | 0.835 (0.006)        | 0.296 (0.001)        | <b>90.47 (0.11)</b>  | 0.716 (0.004)        | 0.251 (0.001)        |
|               |                 | ReRep               | 82.44 (0.15)         | 1.62 (0.003)         | 0.871 (0.001)        | 86.85 (0.16)         | 1.725 (0.004)        | 0.872 (0.001)        | 89.83 (0.11)         | 1.431 (0.003)        | 0.869 (0.001)        |
|               |                 | EASE                | 82.83 (0.15)         | 0.628 (0.005)        | 0.185 (0.001)        | 87.63 (0.16)         | 0.597 (0.005)        | 0.182 (0.001)        | 89.74 (0.12)         | 0.609 (0.004)        | 0.186 (0.001)        |
|               |                 | TCPR                | 83.51 (0.15)         | 0.766 (0.005)        | 0.255 (0.001)        | 88.09 (0.15)         | 0.795 (0.005)        | 0.283 (0.001)        | 90.28 (0.11)         | 0.687 (0.004)        | 0.236 (0.001)        |
|               |                 | noHub               | 83.28 (0.15)         | <b>0.287 (0.004)</b> | 0.096 (0.001)        | 87.58 (0.16)         | <b>0.288 (0.004)</b> | 0.102 (0.001)        | 89.89 (0.12)         | <b>0.334 (0.004)</b> | 0.121 (0.001)        |
|               |                 | noHub-S             | 83.25 (0.16)         | 0.487 (0.006)        | <b>0.086 (0.001)</b> | 87.82 (0.16)         | 0.469 (0.006)        | <b>0.091 (0.001)</b> | 89.38 (0.17)         | nan (nan)            | <b>0.097 (0.001)</b> |
|               | SIAMESE         | None                | 20.0 (0.0)           | 1.441 (0.009)        | 0.421 (0.001)        | 20.0 (0.0)           | 1.339 (0.009)        | 0.433 (0.001)        | 20.0 (0.0)           | 0.984 (0.005)        | 0.364 (0.001)        |
|               |                 | L2                  | 83.14 (0.14)         | 1.035 (0.007)        | 0.319 (0.001)        | 87.04 (0.16)         | 0.912 (0.006)        | 0.288 (0.001)        | 89.48 (0.12)         | 0.808 (0.005)        | 0.264 (0.001)        |
|               |                 | CL2                 | 84.04 (0.15)         | 0.788 (0.005)        | 0.264 (0.001)        | 87.9 (0.16)          | 0.816 (0.006)        | 0.28 (0.001)         | 90.14 (0.12)         | 0.698 (0.005)        | 0.235 (0.001)        |
|               |                 | ZN                  | 20.0 (0.0)           | 0.8 (0.005)          | 0.263 (0.001)        | 20.0 (0.0)           | 0.84 (0.006)         | 0.296 (0.001)        | 20.0 (0.0)           | 0.713 (0.004)        | 0.251 (0.001)        |
|               |                 | ReRep               | 20.0 (0.0)           | 1.633 (0.003)        | 0.863 (0.001)        | 20.0 (0.0)           | 1.724 (0.004)        | 0.872 (0.001)        | 20.0 (0.0)           | 1.428 (0.002)        | 0.869 (0.001)        |
|               |                 | EASE                | 84.61 (0.15)         | 0.63 (0.005)         | 0.187 (0.001)        | 88.33 (0.16)         | 0.594 (0.004)        | 0.182 (0.001)        | 90.42 (0.12)         | 0.607 (0.004)        | 0.185 (0.001)        |
|               |                 | TCPR                | 84.39 (0.15)         | 0.772 (0.005)        | 0.259 (0.001)        | 88.26 (0.16)         | 0.791 (0.005)        | 0.283 (0.001)        | 90.5 (0.11)          | 0.686 (0.004)        | 0.235 (0.001)        |
|               |                 | noHub               | 84.05 (0.16)         | 0.292 (0.004)        | 0.096 (0.001)        | 87.87 (0.17)         | <b>0.291 (0.004)</b> | 0.103 (0.001)        | 90.34 (0.12)         | <b>0.334 (0.004)</b> | 0.12 (0.001)         |
|               |                 | noHub-S             | <b>84.67 (0.15)</b>  | <b>0.247 (0.005)</b> | <b>0.074 (0.001)</b> | <b>88.43 (0.16)</b>  | 0.473 (0.006)        | <b>0.092 (0.001)</b> | <b>90.52 (0.12)</b>  | 0.443 (0.006)        | <b>0.097 (0.001)</b> |
| SimpleShot    | None            | 78.5 (0.14)         | 1.436 (0.009)        | 0.422 (0.001)        | 83.95 (0.16)         | 1.339 (0.008)        | 0.432 (0.001)        | 85.65 (0.12)         | 0.987 (0.005)        | 0.364 (0.001)        |                      |
|               | L2              | 79.89 (0.14)        | 1.04 (0.007)         | 0.318 (0.001)        | 84.5 (0.16)          | 0.914 (0.006)        | 0.287 (0.001)        | 86.46 (0.12)         | 0.812 (0.005)        | 0.263 (0.001)        |                      |
|               | CL2             | 80.0 (0.14)         | 0.786 (0.005)        | 0.264 (0.001)        | 84.66 (0.16)         | 0.821 (0.006)        | 0.28 (0.001)         | 86.3 (0.12)          | 0.698 (0.005)        | 0.236 (0.001)        |                      |
|               | ZN              | 80.57 (0.14)        | 0.806 (0.005)        | 0.264 (0.001)        | 84.97 (0.16)         | 0.839 (0.006)        | 0.296 (0.001)        | 86.76 (0.12)         | 0.716 (0.005)        | 0.25 (0.001)         |                      |
|               | ReRep           | 80.86 (0.14)        | 1.631 (0.003)        | 0.863 (0.001)        | 85.05 (0.16)         | 1.721 (0.004)        | 0.872 (0.001)        | 87.83 (0.12)         | 1.432 (0.002)        | 0.869 (0.001)        |                      |
|               | EASE            | 80.13 (0.14)        | 0.624 (0.005)        | 0.186 (0.001)        | 84.74 (0.16)         | 0.598 (0.004)        | 0.183 (0.001)        | 86.76 (0.12)         | 0.607 (0.004)        | 0.186 (0.001)        |                      |
|               | TCPR            | 80.15 (0.14)        | 0.78 (0.005)         | 0.259 (0.001)        | 84.86 (0.15)         | 0.796 (0.005)        | 0.283 (0.001)        | 86.8 (0.12)          | 0.687 (0.004)        | 0.235 (0.001)        |                      |
|               | noHub           | <b>82.13 (0.14)</b> | 0.286 (0.004)        | 0.096 (0.001)        | <b>86.31 (0.16)</b>  | 0.289 (0.004)        | 0.104 (0.001)        | <b>88.46 (0.11)</b>  | <b>0.329 (0.004)</b> | 0.12 (0.001)         |                      |
|               | noHub-S         | 81.22 (0.14)        | <b>0.25 (0.005)</b>  | <b>0.074 (0.001)</b> | 86.22 (0.15)         | <b>0.213 (0.005)</b> | <b>0.078 (0.001)</b> | 87.6 (0.12)          | 0.433 (0.006)        | <b>0.097 (0.001)</b> |                      |
| $\alpha$ -TIM | None            | 78.51 (0.15)        | 1.45 (0.009)         | 0.42 (0.001)         | 83.86 (0.16)         | 1.341 (0.009)        | 0.433 (0.001)        | 85.7 (0.12)          | 0.981 (0.005)        | 0.363 (0.001)        |                      |
|               | L2              | 80.02 (0.16)        | 1.036 (0.007)        | 0.318 (0.001)        | 84.49 (0.18)         | 0.92 (0.006)         | 0.288 (0.001)        | 87.88 (0.13)         | 0.812 (0.005)        | 0.264 (0.001)        |                      |
|               | CL2             | 80.46 (0.16)        | 0.784 (0.005)        | 0.264 (0.001)        | 84.86 (0.17)         | 0.82 (0.006)         | 0.281 (0.001)        | 87.53 (0.13)         | 0.701 (0.005)        | 0.235 (0.001)        |                      |
|               | ZN              | 80.32 (0.14)        | 0.802 (0.005)        | 0.263 (0.001)        | 84.93 (0.16)         | 0.834 (0.006)        | 0.295 (0.001)        | 86.95 (0.12)         | 0.715 (0.004)        | 0.25 (0.001)         |                      |
|               | ReRep           | 81.05 (0.14)        | 1.63 (0.003)         | 0.863 (0.001)        | 85.18 (0.16)         | 1.718 (0.004)        | 0.872 (0.001)        | 87.63 (0.12)         | 1.43 (0.002)         | 0.87 (0.001)         |                      |
|               | EASE            | 79.13 (0.15)        | 0.632 (0.005)        | 0.188 (0.001)        | 84.04 (0.17)         | 0.596 (0.004)        | 0.181 (0.001)        | 86.7 (0.13)          | 0.607 (0.004)        | 0.186 (0.001)        |                      |
|               | TCPR            | 80.52 (0.16)        | 0.776 (0.005)        | 0.259 (0.001)        | 85.01 (0.17)         | 0.796 (0.005)        | 0.283 (0.001)        | 87.81 (0.13)         | 0.681 (0.004)        | 0.234 (0.001)        |                      |
|               | noHub           | <b>81.39 (0.15)</b> | 0.29 (0.004)         | 0.096 (0.001)        | 86.09 (0.16)         | 0.292 (0.004)        | 0.103 (0.001)        | <b>88.16 (0.12)</b>  | <b>0.336 (0.004)</b> | 0.121 (0.001)        |                      |
|               | noHub-S         | 81.37 (0.15)        | <b>0.253 (0.005)</b> | <b>0.074 (0.001)</b> | <b>86.14 (0.16)</b>  | <b>0.219 (0.005)</b> | <b>0.078 (0.001)</b> | 87.97 (0.12)         | 0.437 (0.006)        | <b>0.096 (0.001)</b> |                      |

Table 4. Resnet-18: 5-shot.



| Arch.           | Clf.          | Emb.                | mini                 |                      |                     | tiered               |                      |                     | CUB                  |                      |               |
|-----------------|---------------|---------------------|----------------------|----------------------|---------------------|----------------------|----------------------|---------------------|----------------------|----------------------|---------------|
|                 |               |                     | Acc                  | Skew                 | Hub. Occ.           | Acc                  | Skew                 | Hub. Occ.           | Acc                  | Skew                 | Hub. Occ.     |
| ILPC            | None          | 81.93 (0.16)        | 1.717 (0.01)         | 0.473 (0.001)        | 84.34 (0.17)        | 1.927 (0.011)        | 0.509 (0.001)        | 93.18 (0.11)        | 1.164 (0.008)        | 0.396 (0.001)        |               |
|                 | L2            | 85.74 (0.14)        | 0.888 (0.005)        | 0.322 (0.001)        | 86.26 (0.17)        | 0.859 (0.005)        | 0.306 (0.001)        | 93.77 (0.1)         | 0.636 (0.004)        | 0.266 (0.001)        |               |
|                 | CL2           | 83.33 (0.16)        | 1.12 (0.009)         | 0.318 (0.001)        | 85.99 (0.17)        | 0.957 (0.006)        | 0.338 (0.001)        | 93.79 (0.1)         | 0.703 (0.004)        | 0.309 (0.001)        |               |
|                 | ZN            | 85.96 (0.14)        | 0.858 (0.005)        | 0.32 (0.001)         | 86.77 (0.16)        | 0.909 (0.006)        | 0.335 (0.001)        | 93.73 (0.1)         | 0.696 (0.004)        | 0.305 (0.001)        |               |
|                 | ReRep         | 72.11 (0.27)        | 1.601 (0.003)        | 0.819 (0.001)        | 71.68 (0.3)         | 1.616 (0.004)        | 0.845 (0.001)        | 91.52 (0.13)        | 1.301 (0.005)        | 0.548 (0.002)        |               |
|                 | EASE          | 85.89 (0.14)        | 0.577 (0.004)        | 0.198 (0.001)        | 86.83 (0.17)        | 0.583 (0.004)        | 0.193 (0.001)        | <b>93.87 (0.1)</b>  | 0.576 (0.004)        | 0.242 (0.001)        |               |
|                 | TCPR          | 86.29 (0.14)        | 0.715 (0.004)        | 0.27 (0.001)         | 86.96 (0.17)        | 0.819 (0.005)        | 0.295 (0.001)        | 93.82 (0.1)         | 0.634 (0.004)        | 0.265 (0.001)        |               |
|                 | noHub         | 86.07 (0.15)        | <b>0.295 (0.004)</b> | 0.115 (0.001)        | 86.75 (0.17)        | <b>0.299 (0.004)</b> | <b>0.115 (0.001)</b> | 93.72 (0.1)         | <b>0.2 (0.004)</b>   | <b>0.101 (0.001)</b> |               |
|                 | noHub-S       | <b>86.41 (0.14)</b> | 0.499 (0.006)        | <b>0.104 (0.001)</b> | <b>87.31 (0.17)</b> | 0.406 (0.005)        | 0.121 (0.001)        | 93.79 (0.1)         | 0.416 (0.005)        | 0.126 (0.001)        |               |
|                 | LaplacianShot | None                | 85.23 (0.13)         | 1.711 (0.01)         | 0.474 (0.001)       | 86.14 (0.15)         | 1.921 (0.011)        | 0.509 (0.001)       | 92.61 (0.1)          | 1.164 (0.008)        | 0.395 (0.001) |
| L2              |               | 85.9 (0.13)         | 0.892 (0.006)        | 0.321 (0.001)        | 86.47 (0.15)        | 0.867 (0.006)        | 0.304 (0.001)        | 93.17 (0.09)        | 0.635 (0.004)        | 0.267 (0.001)        |               |
| CL2             |               | 82.08 (0.15)        | 1.112 (0.009)        | 0.318 (0.001)        | 84.62 (0.16)        | 0.954 (0.006)        | 0.34 (0.001)         | 93.01 (0.1)         | 0.702 (0.004)        | 0.309 (0.001)        |               |
| ZN              |               | 85.97 (0.13)        | 0.86 (0.005)         | 0.319 (0.001)        | 86.67 (0.15)        | 0.912 (0.006)        | 0.335 (0.001)        | 93.3 (0.1)          | 0.698 (0.004)        | 0.305 (0.001)        |               |
| ReRep           |               | 84.34 (0.14)        | 1.599 (0.003)        | 0.819 (0.001)        | 85.61 (0.16)        | 1.615 (0.004)        | 0.845 (0.001)        | 92.2 (0.1)          | 1.304 (0.005)        | 0.549 (0.002)        |               |
| EASE            |               | 86.24 (0.13)        | 0.573 (0.004)        | 0.198 (0.001)        | 86.74 (0.15)        | 0.582 (0.004)        | 0.194 (0.001)        | 93.31 (0.09)        | 0.578 (0.004)        | 0.243 (0.001)        |               |
| TCPR            |               | 86.16 (0.13)        | 0.712 (0.004)        | 0.269 (0.001)        | 85.72 (0.16)        | 0.813 (0.005)        | 0.293 (0.001)        | 92.99 (0.1)         | 0.638 (0.004)        | 0.264 (0.001)        |               |
| noHub           |               | <b>86.25 (0.13)</b> | <b>0.292 (0.004)</b> | 0.115 (0.001)        | <b>86.78 (0.16)</b> | <b>0.299 (0.004)</b> | <b>0.115 (0.001)</b> | <b>93.38 (0.09)</b> | <b>0.197 (0.004)</b> | <b>0.1 (0.001)</b>   |               |
| noHub-S         |               | 85.79 (0.13)        | 0.494 (0.006)        | <b>0.103 (0.001)</b> | 86.44 (0.16)        | 0.397 (0.005)        | 0.12 (0.001)         | 93.36 (0.1)         | 0.42 (0.005)         | 0.126 (0.001)        |               |
| ObliqueManifold |               | None                | 87.46 (0.13)         | 1.712 (0.01)         | 0.472 (0.001)       | 88.16 (0.15)         | 1.913 (0.01)         | 0.509 (0.001)       | 94.75 (0.09)         | 1.161 (0.008)        | 0.395 (0.001) |
|                 | L2            | 87.61 (0.13)        | 0.889 (0.005)        | 0.321 (0.001)        | 88.14 (0.15)        | 0.862 (0.006)        | 0.306 (0.001)        | <b>94.8 (0.09)</b>  | 0.642 (0.004)        | 0.268 (0.001)        |               |
|                 | CL2           | 86.03 (0.14)        | 1.112 (0.009)        | 0.317 (0.001)        | 87.64 (0.16)        | 0.949 (0.006)        | 0.338 (0.001)        | 94.67 (0.09)        | 0.703 (0.004)        | 0.31 (0.001)         |               |
|                 | ZN            | 87.88 (0.13)        | 0.852 (0.005)        | 0.32 (0.001)         | <b>88.43 (0.15)</b> | 0.908 (0.006)        | 0.335 (0.001)        | 94.77 (0.08)        | 0.697 (0.004)        | 0.306 (0.001)        |               |
|                 | ReRep         | 87.62 (0.12)        | 1.599 (0.003)        | 0.819 (0.001)        | 88.15 (0.15)        | 1.616 (0.004)        | 0.845 (0.001)        | 94.48 (0.09)        | 1.302 (0.005)        | 0.547 (0.002)        |               |
|                 | EASE          | 86.75 (0.13)        | 0.573 (0.004)        | 0.198 (0.001)        | 87.78 (0.15)        | 0.583 (0.004)        | 0.193 (0.001)        | 94.16 (0.09)        | 0.57 (0.004)         | 0.24 (0.001)         |               |
|                 | TCPR          | <b>87.94 (0.12)</b> | 0.718 (0.004)        | 0.271 (0.001)        | 88.15 (0.15)        | 0.816 (0.005)        | 0.294 (0.001)        | 94.47 (0.09)        | 0.635 (0.004)        | 0.265 (0.001)        |               |
|                 | noHub         | 87.23 (0.13)        | <b>0.297 (0.004)</b> | 0.115 (0.001)        | 87.95 (0.16)        | <b>0.296 (0.004)</b> | <b>0.114 (0.001)</b> | 94.13 (0.09)        | <b>0.197 (0.004)</b> | <b>0.1 (0.001)</b>   |               |
|                 | noHub-S       | 87.13 (0.14)        | 0.495 (0.006)        | <b>0.103 (0.001)</b> | 87.84 (0.16)        | 0.399 (0.005)        | 0.12 (0.001)         | 94.06 (0.09)        | 0.421 (0.005)        | 0.126 (0.001)        |               |
|                 | SIAMESE       | None                | 58.82 (0.31)         | 1.722 (0.01)         | 0.473 (0.001)       | 82.56 (0.22)         | 1.93 (0.01)          | 0.511 (0.001)       | 82.22 (0.37)         | 1.154 (0.008)        | 0.396 (0.001) |
| L2              |               | 87.11 (0.13)        | 0.894 (0.006)        | 0.321 (0.001)        | 87.34 (0.15)        | 0.861 (0.005)        | 0.305 (0.001)        | 94.15 (0.1)         | 0.638 (0.004)        | 0.266 (0.001)        |               |
| CL2             |               | 83.99 (0.16)        | 1.107 (0.009)        | 0.318 (0.001)        | 86.71 (0.16)        | 0.953 (0.006)        | 0.339 (0.001)        | 94.48 (0.09)        | 0.704 (0.004)        | 0.31 (0.001)         |               |
| ZN              |               | 20.0 (0.0)          | 0.856 (0.005)        | 0.319 (0.001)        | 20.0 (0.0)          | 0.913 (0.006)        | 0.334 (0.001)        | 20.0 (0.0)          | 0.702 (0.004)        | 0.305 (0.001)        |               |
| ReRep           |               | 36.41 (0.3)         | 1.597 (0.003)        | 0.818 (0.001)        | 76.49 (0.24)        | 1.613 (0.004)        | 0.846 (0.001)        | 60.36 (0.6)         | 1.299 (0.005)        | 0.547 (0.002)        |               |
| EASE            |               | 87.82 (0.13)        | 0.579 (0.004)        | 0.199 (0.001)        | 88.06 (0.16)        | 0.586 (0.004)        | 0.192 (0.001)        | 94.36 (0.09)        | 0.571 (0.004)        | 0.241 (0.001)        |               |
| TCPR            |               | 87.8 (0.13)         | 0.717 (0.004)        | 0.27 (0.001)         | 87.95 (0.16)        | 0.822 (0.005)        | 0.295 (0.001)        | 94.25 (0.1)         | 0.637 (0.004)        | 0.266 (0.001)        |               |
| noHub           |               | 87.78 (0.14)        | <b>0.29 (0.004)</b>  | 0.114 (0.001)        | 87.99 (0.17)        | <b>0.297 (0.004)</b> | <b>0.115 (0.001)</b> | 94.56 (0.09)        | <b>0.196 (0.004)</b> | <b>0.1 (0.001)</b>   |               |
| noHub-S         |               | <b>88.03 (0.13)</b> | 0.492 (0.006)        | <b>0.103 (0.001)</b> | <b>88.31 (0.16)</b> | 0.398 (0.005)        | 0.12 (0.001)         | <b>94.69 (0.09)</b> | 0.416 (0.005)        | 0.127 (0.001)        |               |
| SimpleShot      |               | None                | 78.56 (0.14)         | 1.709 (0.01)         | 0.473 (0.001)       | 80.32 (0.16)         | 1.937 (0.01)         | 0.51 (0.001)        | 89.27 (0.11)         | 1.16 (0.008)         | 0.395 (0.001) |
|                 | L2            | 83.81 (0.13)        | 0.887 (0.005)        | 0.322 (0.001)        | 84.82 (0.15)        | 0.86 (0.006)         | 0.305 (0.001)        | 92.06 (0.1)         | 0.632 (0.004)        | 0.266 (0.001)        |               |
|                 | CL2           | 81.05 (0.14)        | 1.12 (0.009)         | 0.318 (0.001)        | 83.82 (0.16)        | 0.956 (0.006)        | 0.337 (0.001)        | 92.19 (0.1)         | 0.701 (0.004)        | 0.31 (0.001)         |               |
|                 | ZN            | 83.92 (0.13)        | 0.858 (0.005)        | 0.32 (0.001)         | 85.1 (0.15)         | 0.912 (0.006)        | 0.335 (0.001)        | 92.17 (0.1)         | 0.699 (0.004)        | 0.305 (0.001)        |               |
|                 | ReRep         | 79.26 (0.16)        | 1.597 (0.003)        | 0.819 (0.001)        | 82.7 (0.16)         | 1.617 (0.004)        | 0.846 (0.001)        | 91.48 (0.11)        | 1.299 (0.005)        | 0.549 (0.002)        |               |
|                 | EASE          | 83.65 (0.13)        | 0.579 (0.004)        | 0.199 (0.001)        | 84.47 (0.15)        | 0.585 (0.004)        | 0.193 (0.001)        | 92.01 (0.1)         | 0.572 (0.004)        | 0.241 (0.001)        |               |
|                 | TCPR          | 83.77 (0.13)        | 0.717 (0.004)        | 0.27 (0.001)         | 84.81 (0.15)        | 0.815 (0.005)        | 0.294 (0.001)        | 91.84 (0.1)         | 0.634 (0.004)        | 0.264 (0.001)        |               |
|                 | noHub         | <b>85.73 (0.13)</b> | <b>0.294 (0.004)</b> | 0.115 (0.001)        | <b>86.58 (0.15)</b> | <b>0.298 (0.004)</b> | <b>0.115 (0.001)</b> | 93.21 (0.09)        | <b>0.195 (0.004)</b> | <b>0.1 (0.001)</b>   |               |
|                 | noHub-S       | 84.39 (0.13)        | 0.494 (0.006)        | <b>0.103 (0.001)</b> | 86.38 (0.15)        | 0.407 (0.005)        | 0.12 (0.001)         | <b>93.39 (0.09)</b> | 0.421 (0.005)        | 0.127 (0.001)        |               |
|                 | $\alpha$ -TIM | None                | 80.61 (0.15)         | 1.711 (0.01)         | 0.473 (0.001)       | 83.05 (0.18)         | 1.928 (0.01)         | 0.51 (0.001)        | 84.89 (0.29)         | 1.153 (0.008)        | 0.396 (0.001) |
| L2              |               | 83.71 (0.16)        | 0.892 (0.005)        | 0.323 (0.001)        | 84.69 (0.18)        | 0.863 (0.005)        | 0.304 (0.001)        | 92.88 (0.1)         | 0.633 (0.004)        | 0.266 (0.001)        |               |
| CL2             |               | 82.35 (0.16)        | 1.111 (0.009)        | 0.318 (0.001)        | 84.06 (0.18)        | 0.949 (0.006)        | 0.339 (0.001)        | 92.81 (0.1)         | 0.7 (0.004)          | 0.31 (0.001)         |               |
| ZN              |               | 83.93 (0.13)        | 0.857 (0.005)        | 0.321 (0.001)        | 85.07 (0.15)        | 0.912 (0.006)        | 0.336 (0.001)        | 92.15 (0.1)         | 0.698 (0.004)        | 0.306 (0.001)        |               |
| ReRep           |               | 83.4 (0.14)         | 1.596 (0.003)        | 0.82 (0.001)         | 84.4 (0.16)         | 1.615 (0.004)        | 0.845 (0.001)        | 93.19 (0.09)        | 1.302 (0.005)        | 0.547 (0.002)        |               |
| EASE            |               | 82.72 (0.14)        | 0.576 (0.004)        | 0.2 (0.001)          | 83.86 (0.16)        | 0.583 (0.004)        | 0.193 (0.001)        | 92.31 (0.1)         | 0.572 (0.004)        | 0.242 (0.001)        |               |
| TCPR            |               | 84.21 (0.15)        | 0.718 (0.004)        | 0.27 (0.001)         | 84.63 (0.18)        | 0.814 (0.005)        | 0.293 (0.001)        | 92.44 (0.1)         | 0.635 (0.004)        | 0.265 (0.001)        |               |
| noHub           |               | <b>85.56 (0.13)</b> | <b>0.293 (0.004)</b> | 0.115 (0.001)        | <b>86.37 (0.16)</b> | <b>0.3 (0.004)</b>   | <b>0.115 (0.001)</b> | 92.89 (0.1)         | <b>0.193 (0.004)</b> | <b>0.099 (0.001)</b> |               |
| noHub-S         |               | 83.96 (0.15)        | 0.496 (0.006)        | <b>0.102 (0.001)</b> | 86.01 (0.16)        | 0.395 (0.005)        | 0.12 (0.001)         | <b>93.24 (0.1)</b>  | 0.422 (0.005)        | 0.126 (0.001)        |               |

Table 5. WideRes28-10: 5-shot.

## References

- [1] Malik Boudiaf, Ziko Imtiaz Masud, Jérôme Rony, José Dolz, Pablo Piantanida, and Ismail Ben Ayed. Transductive Information Maximization For Few-Shot Learning. In *NeurIPS*, 2020. 4
- [2] Spyros Gidaris, Praveer Singh, and Nikos Komodakis. Unsupervised Representation Learning by Predicting Image Rotations. In *ICLR*, 2018. 4
- [3] Puneet Mangla, Mayank Singh, Abhishek Sinha, Nupur Kumari, Vineeth N Balasubramanian, and Balaji Krishnamurthy. Charting the Right Manifold: Manifold Mixup for Few-shot Learning. In *WACV*, 2020. 4
- [4] Jose C Principe. *Information theoretic learning: Renyi's entropy and kernel perspectives*. Springer Science & Business Media, 2010. 3
- [5] Laurens van der Maaten and Geoffrey E. Hinton. Visualizing data using t-sne. *JMLR*, 2008. 2, 4
- [6] Olivier Veilleux, Malik Boudiaf, Pablo Piantanida, and Ismail Ben Ayed. Realistic evaluation of transductive few-shot learning. In *NeurIPS*, 2021. 4
- [7] Vikas Verma, Alex Lamb, Christopher Beckham, Amir Najafi, Ioannis Mitliagkas, David Lopez-Paz, and Yoshua Bengio. Manifold Mixup: Better Representations by Interpolating Hidden States. In *ICML*, 2019. 4
- [8] Tongzhou Wang and Phillip Isola. Understanding Contrastive Representation Learning through Alignment and Uniformity on the Hypersphere. In *ICML*, 2020. 3, 4
- [9] Hao Zhu and Piotr Koniusz. EASE: Unsupervised Discriminant Subspace Learning for Transductive Few-Shot Learning. In *CVPR*, 2022. 4
